# Supplementary material for: Developing a machine learning model for accurate nucleoside hydrogels prediction based on descriptors
Source: PubMed Central journal article supplement (PMC10960799; doi:10.1038/s41467-024-46866-9), 2024-03-23
Supplement: 41467_2024_46866_MOESM3_ESM.pdf [file 41467_2024_46866_MOESM3_ESM.pdf]

## Description of Additional Supplementary Files

**File Name: Supplementary Data 1**

**Description:** Structure of 71 nucleoside derivatives.

**File Name: Supplementary Data 2**

**Description:** Structure of 71 nucleoside derivatives.

**File Name: Supplementary Data 3**

**Description:** The details of 5566 molecular descriptors.

**File Name: Supplementary Data 4**

**Description:** The optimal combination of descriptors of each algorithm.

**File Name: Supplementary Data 5**

**Description:** Information and feature importance of the optimal model features (LR with 24 descriptors).

**File Name: Supplementary Data 6**

**Description:** The feature importance of 70 molecular descriptors based on LASSO regression.

**File Name: Supplementary Data 7**

**Description:** The predictions of optimal model for nucleoside derivatives from PubChem database.

**File Name: Supplementary Data 8**

**Description:** The validation for the hydrogel-forming ability of the 24 nucleoside derivatives.

**File Name: Supplementary Data 9**

**Description:** Search terms and search strategy of system-wide search.

**File Name: Supplementary Data 10**

**Description:** The atomic coordinates of the optimized computational models.
