# Supplementary material for: Developing a machine learning model for accurate nucleoside hydrogels prediction based on descriptors
Source: PubMed Central journal article supplement (PMC10960799; doi:10.1038/s41467-024-46866-9), 2024-03-23

Gelator group (n=38)

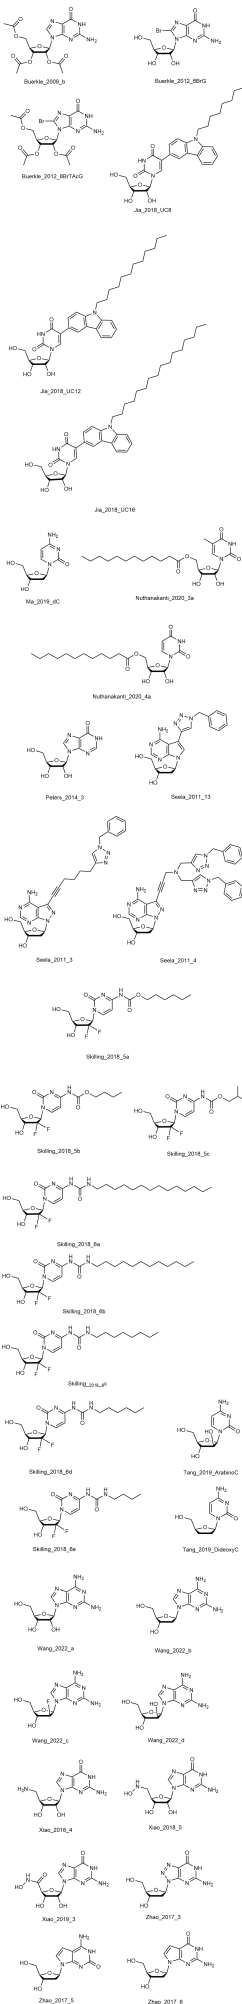

Non-gelator group (n=33)

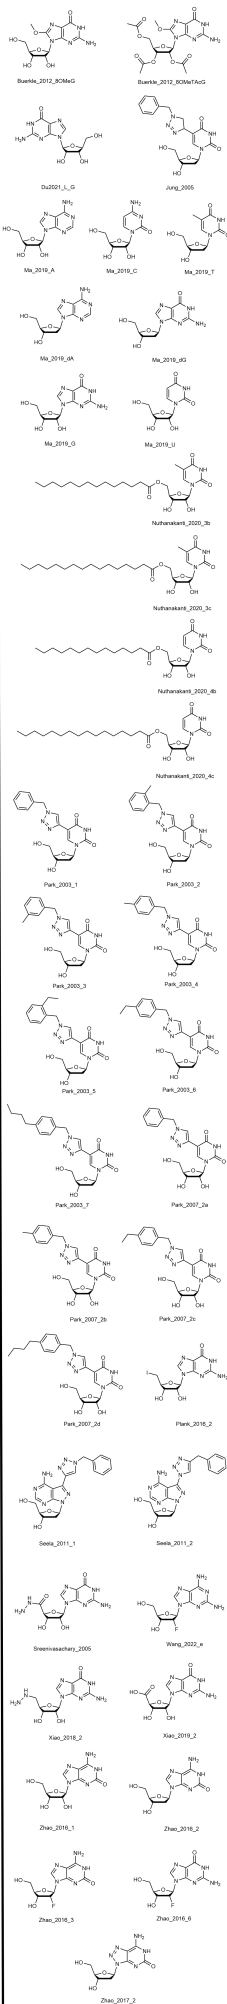

Supplement: 41467_2024_46866_MOESM4_ESM.pdf [file 41467_2024_46866_MOESM4_ESM.pdf]
